# Supplementary material for: VRK1 Regulates Sensitivity to Oxidative Stress by Altering Histone Epigenetic Modifications and the Nuclear Phosphoproteome in Tumor Cells
Source: MDPI journal article supplement (doi:10.3390/ijms25094874), 2024-04-30
Supplement: s1 [file s1]

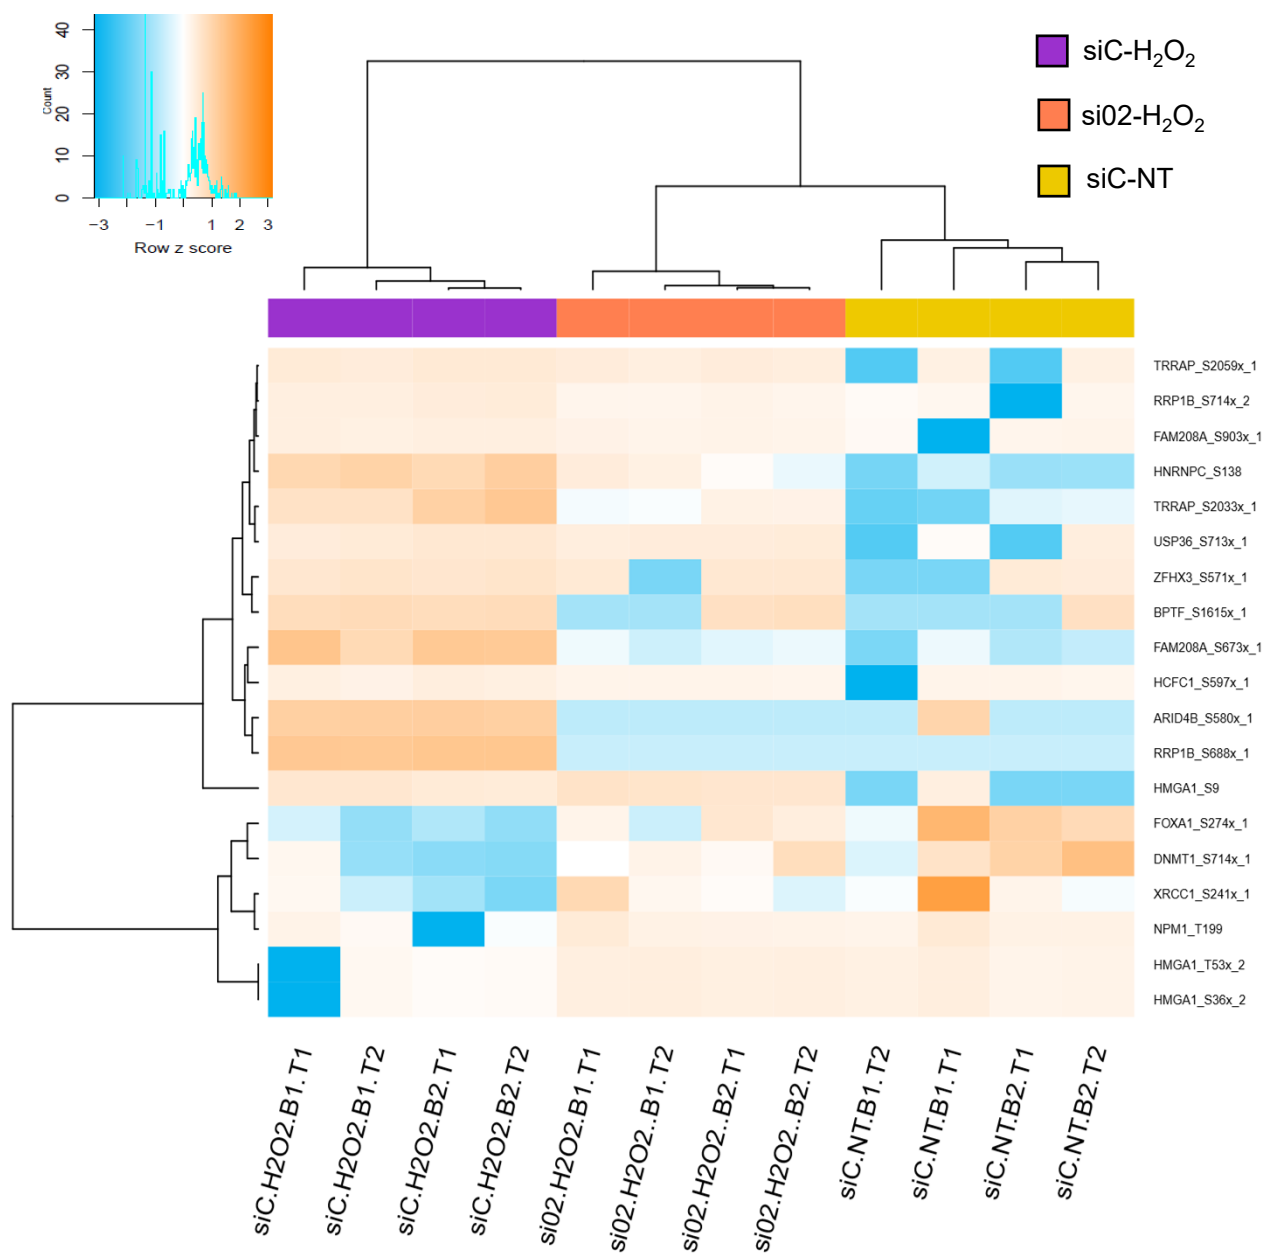

**Figure S4. Phosphorylation intensities of phosphoproteomics replicates in chromatin-related H<sub>2</sub>O<sub>2</sub>-treated A549 cells** Heatmap showing phosphorylation intensities of the overlapping phosphosites differentially expressed in chromatin-enriched proteins after VRK1 knock-down and 30 min of 200  $\mu$ M H<sub>2</sub>O<sub>2</sub> treatment. Row z score of two biological replicates in technical duplicates is shown. siC = siControl; si02 = siVRK1-02; NT = non-treated; H<sub>2</sub>O<sub>2</sub> = H<sub>2</sub>O<sub>2</sub> 200  $\mu$ M 30 min; B1 = biological replicate 1; B2 = biological replicate 2; T1 = technical replicate 1; T2 = technical replicate 2.
