# Supplementary material for: VRK1 Regulates Sensitivity to Oxidative Stress by Altering Histone Epigenetic Modifications and the Nuclear Phosphoproteome in Tumor Cells
Source: MDPI journal article supplement (doi:10.3390/ijms25094874), 2024-04-30
Supplement: s1 [file s1]

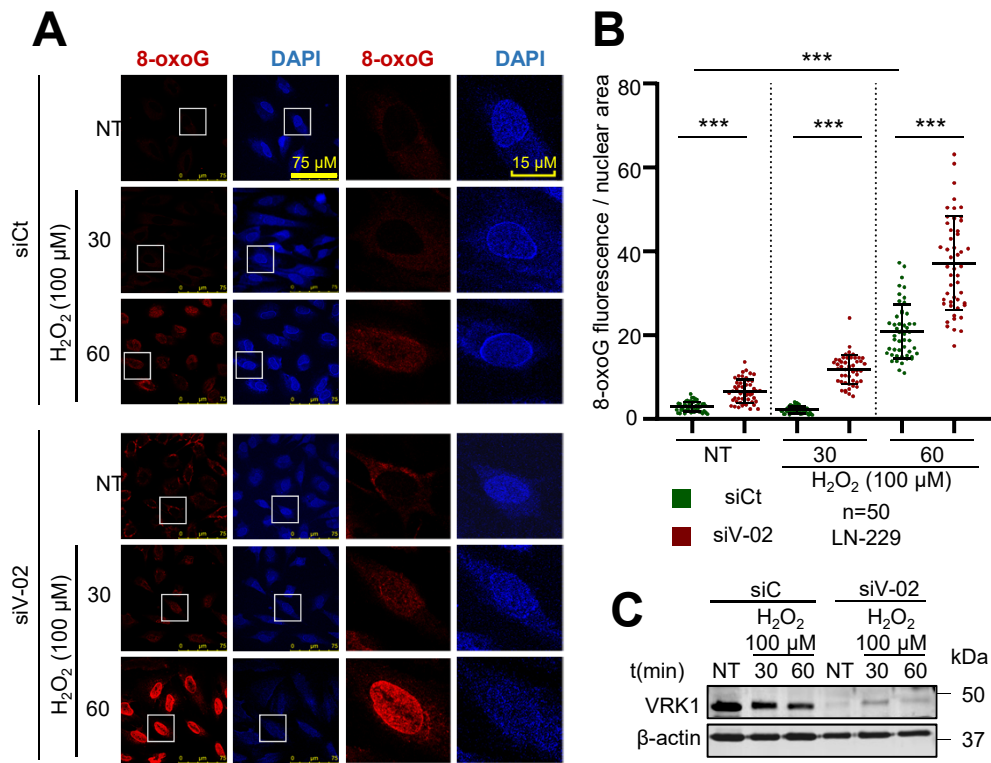

**Figure S2.** Accumulation of 8-oxoG DNA lesions induced by hydrogen peroxide in LN-229 glioblastoma cells that were serum deprived. **A.** Immunofluorescence of LN-229 cells treated with hydrogen peroxide in the absence after depletion of VRK1. The boxes indicate the individual cell shown in the right side panel. **B.** Quantification of the levels of 8-oxoG shown in part A. **C.** Immunoblot showing the depletion of VRK1. \*\*\*  $p < 0.001$ . siCt: control; siV-02: siVRK1.02; NT: non treated. The experiment was independently performed three times.
