# Supplementary material for: VRK1 Regulates Sensitivity to Oxidative Stress by Altering Histone Epigenetic Modifications and the Nuclear Phosphoproteome in Tumor Cells
Source: MDPI journal article supplement (doi:10.3390/ijms25094874), 2024-04-30
Supplement: s1 [file s1]

**Supplementary Table S4.** Secondary antibodies.

| <b>Antibody</b>      | <b>Fluorochrome</b> | <b>Use (dilution)</b> | <b>Reference, Supplier</b>          |
|----------------------|---------------------|-----------------------|-------------------------------------|
| Goat anti-Mouse IgG  | Cy3 (Red)           | IF (1:1000)           | 115-165-146, Jackson ImmunoResearch |
| Goat anti-Rabbit IgG | Cy2 (Green)         | IF (1:1000)           | 111-225-144, Jackson ImmunoResearch |
| Goat anti-Mouse IgG  | DyLight 680 (Red)   | WB (1:10000)          | 35518, Thermo Fisher Scientific     |
| Goat anti-Rabbit IgG | DyLight 800 (Green) | WB (1:10000)          | 35571, Thermo Fisher Scientific     |
