# Supplementary material for: VRK1 Regulates Sensitivity to Oxidative Stress by Altering Histone Epigenetic Modifications and the Nuclear Phosphoproteome in Tumor Cells
Source: MDPI journal article supplement (doi:10.3390/ijms25094874), 2024-04-30
Supplement: s1 [file s1]

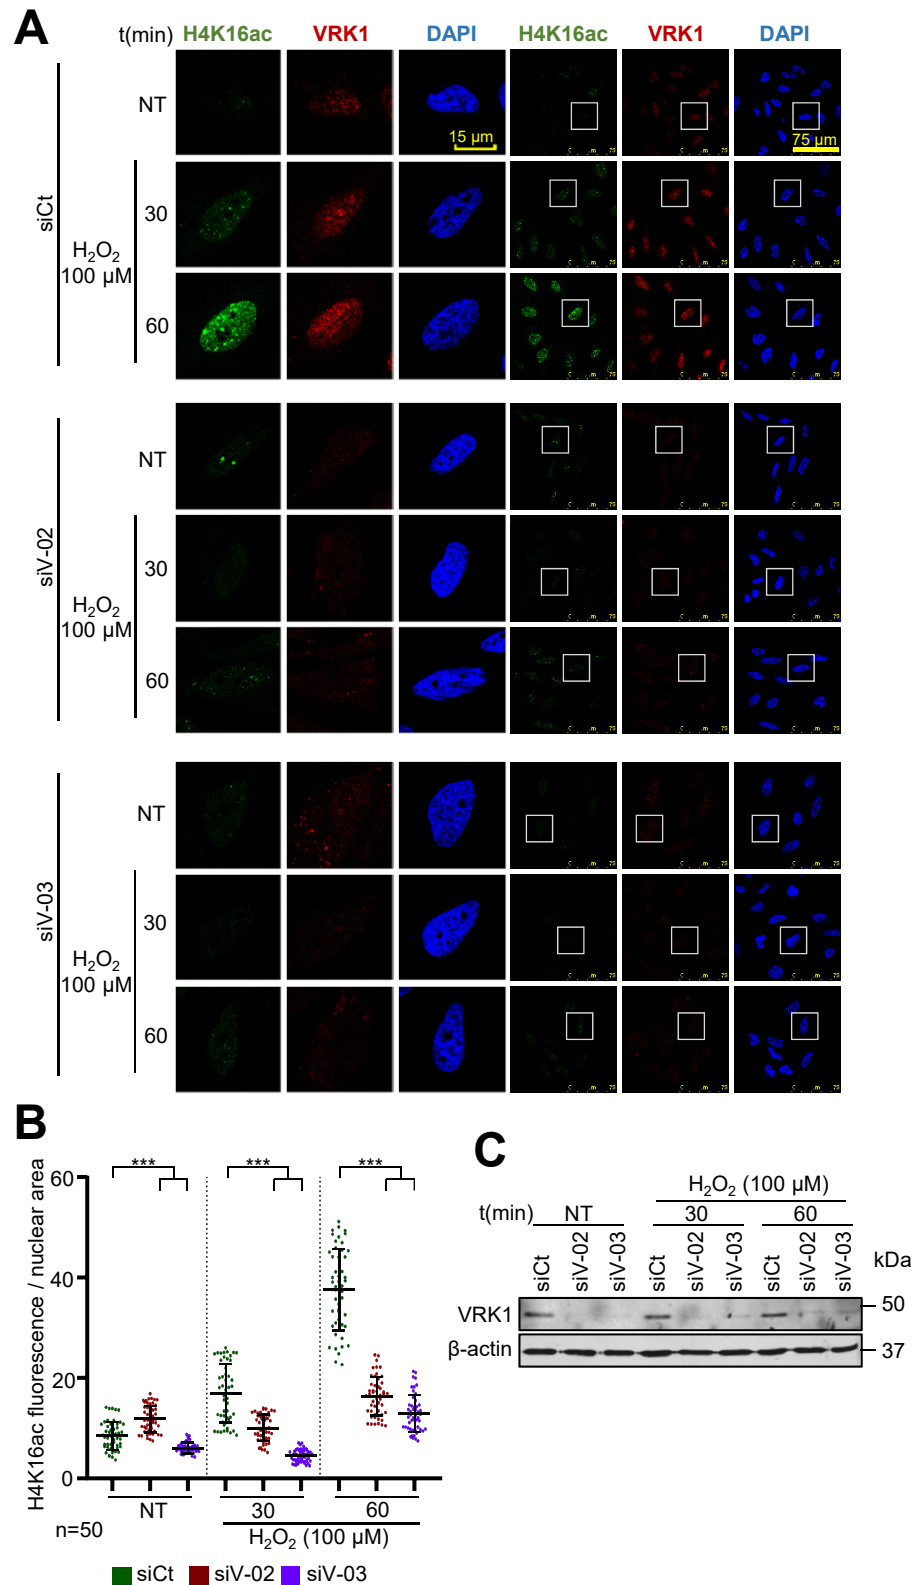

**Figure S5.** VRK1 depletion induces the decrease of H4K16ac after treatment with hydrogen peroxide in LN-229 glioblastoma cells. **A.** Immunofluorescence. The boxes indicate the individual cells shown. **B.** Quantification of the level of H4K16 acetylation. **C.** Immunoblot showing the depletion of VRK1. \*\*\*  $p < 0.001$ . NT: not treated. The experiment was independently performed three times.
