# Supplementary material for: VRK1 Regulates Sensitivity to Oxidative Stress by Altering Histone Epigenetic Modifications and the Nuclear Phosphoproteome in Tumor Cells
Source: MDPI journal article supplement (doi:10.3390/ijms25094874), 2024-04-30
Supplement: s1 [file s1]

**Supplementary Table S2.** Composition of buffers.

| <b>Buffers</b>         | <b>Composition</b>                                                                                                |
|------------------------|-------------------------------------------------------------------------------------------------------------------|
| <b>Lysis</b>           | 50 mM Tris-HCl (pH 8.0), 150 mM NaCl, 1% Triton X-100 and 1 mM EDTA.                                              |
| <b>Kinase assay</b>    | 20mM Tris-HCl (pH.5), 5mM MgCl <sub>2</sub> , 0.5 mM DTT, 150 mM KCl, 5 μM ATP and 5 μCi ATP-[γ- <sup>32</sup> P] |
| <b>Sample</b>          | 62.5 mM Tris-HCl (pH 6.8), 10% glycerol, 2.3% SDS, 0.1% bromophenol blue, and 5% β-mercaptoethanol                |
| <b>Electrophoresis</b> | 25 mM Tris-HCl, 200 mM glycine and 1.7 mM SDS                                                                     |
| <b>Transfer</b>        | 25 mM Tris-HCl, 19.2 mM glycine and 10-20% methanol                                                               |
| <b>TBS-T</b>           | 25 mM Tris-HCl (pH 8.0), 50 mM NaCl, 2.5 mM KCl and 0.1% Tween-20                                                 |
| <b>Cytosolic</b>       | 10 mM HEPES pH 7.5, 40 mM KCl, 3 mM MgCl <sub>2</sub> , 5% glycerol, 2.5% IGEPAL                                  |
| <b>Nuclear</b>         | 20 mM HEPES pH 8, 9 M urea                                                                                        |
