# Supplementary material for: VRK1 Regulates Sensitivity to Oxidative Stress by Altering Histone Epigenetic Modifications and the Nuclear Phosphoproteome in Tumor Cells
Source: MDPI journal article supplement (doi:10.3390/ijms25094874), 2024-04-30
Supplement: s1 [file s1]

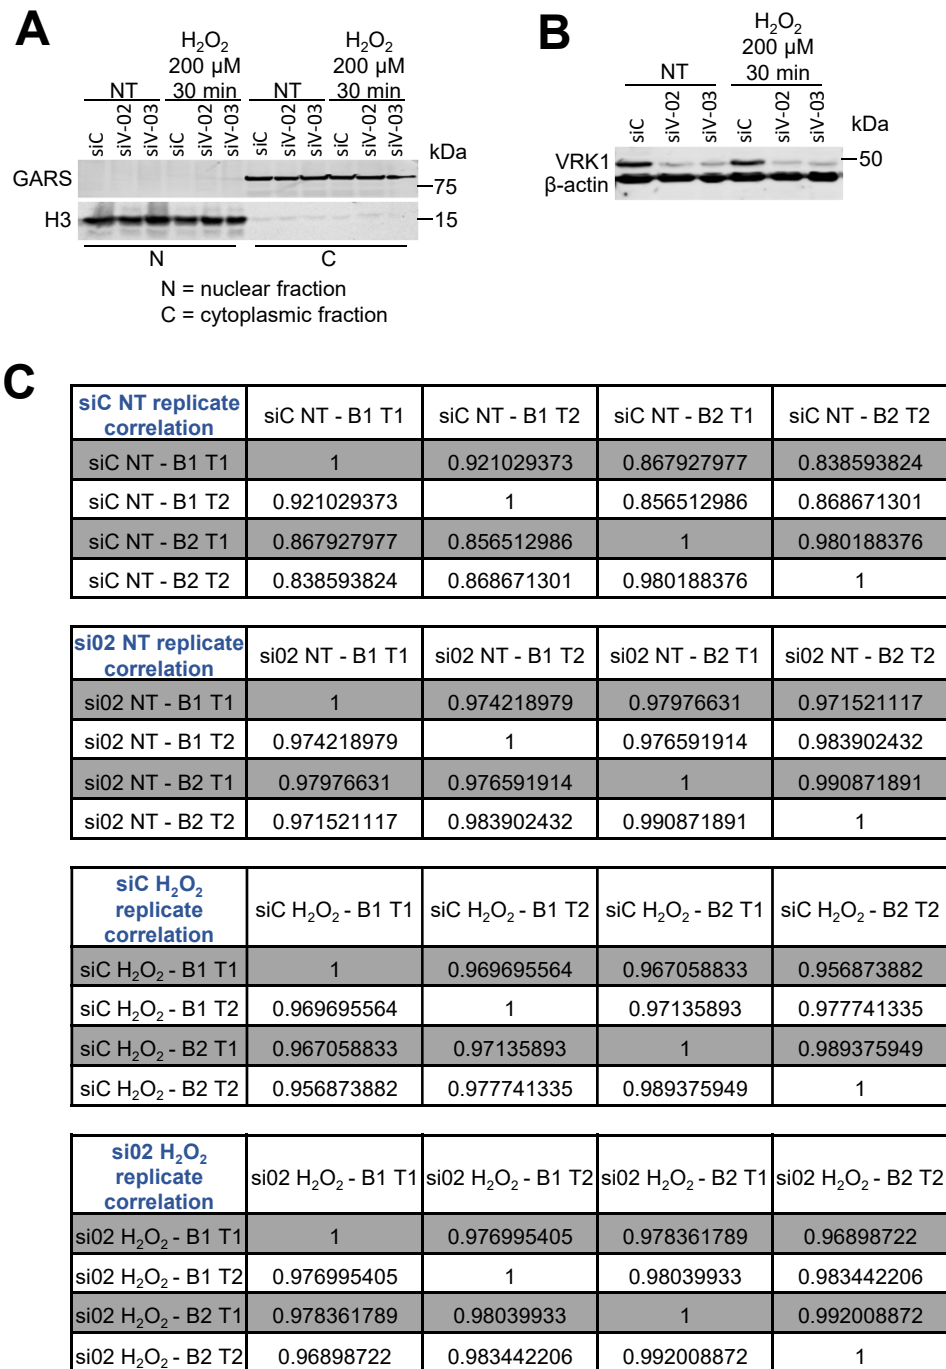

**Figure S3.** Nuclei isolation and replica correlations. **A.** Fractionation of nuclear (histone H3 as marker) and cytoplasmic proteins (GARS as marker). **B.** Control showing in immunoblots the effect of VRK1 depletion on its levels. **C.** Correlation among the replicas of the experiments.
