# Supplementary material for: VRK1 Regulates Sensitivity to Oxidative Stress by Altering Histone Epigenetic Modifications and the Nuclear Phosphoproteome in Tumor Cells
Source: MDPI journal article supplement (doi:10.3390/ijms25094874), 2024-04-30
Supplement: s1 [file s1]

**Supplementary Table S3.** Primary antibodies.

| Target                   | antibody          | Dilution (WB/IF) | Clone, reference  | Supplier       |
|--------------------------|-------------------|------------------|-------------------|----------------|
| VRK1                     | Mouse monoclonal  | - / 1:1000       | 1B5               | [1]            |
| VRK1                     | Mouse monoclonal  | 1:1000 / -       | 1F6               | [1]            |
| VRK1                     | Rabbit polyclonal | 1:1000 / -       | VC                | [1]            |
| $\beta$ -actin           | Mouse monoclonal  | 1:2000 / -       | AC15<br>A5441     | Sigma-Aldrich  |
| H3K4me3                  | Rabbit polyclonal | - /1:1000        | 9727              | Cell signaling |
| H3K9ac                   | Rabbit polyclonal | - / 1:1000       | 07-352            | Millipore      |
| H3K9me3                  | Rabbit polyclonal | - /1:800         | 07-442            | Millipore      |
| H3K27ac                  | Rabbit polyclonal | - /1:1000        | 07-360            | Millipore      |
| Histone H3               | Rabbit polyclonal | 1:1000 / -       | 9715              | Cell signaling |
| H4K16ac                  | Rabbit monoclonal | - / 1:1000       | Ab109463          | Abcam          |
| 8-oxoGuanine<br>(8-oxoG) | Mouse monoclonal  | - / 1:500        | 483.15<br>MAB3560 | Millipore      |
| GARS                     | Mouse monoclonal  | - / 1:1000       | VMA00198          | Bio Rad        |

1. Valbuena A, Lopez-Sanchez I, Vega FM, Sevilla A, Sanz-Garcia M, Blanco S, Lazo PA: **Identification of a dominant epitope in human vaccinia-related kinase 1 (VRK1) and detection of different intracellular subpopulations.** *Arch Biochem Biophys* 2007, **465**(1):219-226. Doi 10.1016/j.abb.2007.06.005
