# Supplementary material for: VRK1 Regulates Sensitivity to Oxidative Stress by Altering Histone Epigenetic Modifications and the Nuclear Phosphoproteome in Tumor Cells
Source: Int J Mol Sci. 2024 Apr 30;25(9):4874. doi: 10.3390/ijms25094874 (PMC11084957; doi:10.3390/ijms25094874)
Supplement: Supplementary file 1 [file ijms-25-04874-s001.zip › Supplementary Table S1.xlsx]

## Sheet: Figure4_VENN
Supplementary Table S1: Gene ontology analysis using string enrichment on the proteins that composed the network
si-Control vs si-Control-H2O2		si-Control-H2O2 vs siV02-H2O2		Intersection
UNIPROT_residue	PROTEINS NAMES	UNIPROT_residue	PROTEINS NAMES	UNIPROT_residue	PROTEINS NAMES
Q9Y4A5_S2051	TRRAP	Q9Y4A5_S2077	TRRAP	Q9Y4A5_S2051	TRRAP
Q9Y4A5_S2077	TRRAP	Q9Y4A5_S2051	TRRAP	Q9Y4A5_S2077	TRRAP
Q9UK61_S673	FAM208A	Q9UK61_S694	FAM208A	Q9UK61_S673	FAM208A
Q9UK61_S903	FAM208A	Q9UK61_S1103	FAM208A	Q9UK61_S903	FAM208A
Q9P275_S713	USP36	Q9UK61_S903	FAM208A	Q9P275_S713	USP36
Q9HC52_S256	CBX8	Q9UK61_S673	FAM208A	Q9H1E3_S214	NUCKS1
Q9HC52_S265	CBX8	Q9P275_S713	USP36	Q7Z3K3_S746	POGZ
Q9H1E3_S214	NUCKS1	Q9HC52_S110	CBX8	Q4LE39_S666	ARID4B
Q7Z3K3_S746	POGZ	Q9H1E3_S19	NUCKS1	Q15911_S571	ZFHX3
Q4LE39_S666	ARID4B	Q9H1E3_S214	NUCKS1	Q14684_S706	RRP1B
Q15911_S571	ZFHX3	Q9H1E3_S75	NUCKS1	Q14684_S732	RRP1B
Q15911_S3432	ZFHX3	Q9H1E3_S79	NUCKS1	Q12830_S1615	BPTF
Q14684_S706	RRP1B	Q7Z3K3_S746	POGZ	P55317_S307	FOXA1
Q14684_S732	RRP1B	Q4LE39_S666	ARID4B	P51610_S666	HCFC1
Q13263_S473	TRIM28	Q15911_S571	ZFHX3	P42166_S433	TMPO
Q13263_S19	TRIM28	Q14684_S732	RRP1B	P26358_S714	DNMT1
Q12830_S1615	BPTF	Q14684_S706	RRP1B	P18887_S241	XRCC1
Q06587_S38	RING1	Q14684_S736	RRP1B	P17096_S9	HMGA1
P55317_S307	FOXA1	Q13263_S50	TRIM28	P17096_S36	HMGA1
P51610_S666	HCFC1	Q12830_S1615	BPTF	P17096_T53	HMGA1
P51531_S666	SMARCA2	Q06587_S188	RING1	P07910_S138	HNRNPC
P49792_S781	RANBP2	P55317_S307	FOXA1	P06748_T199	NPM1
P49792_T779	RANBP2	P51610_S666	HCFC1	P00533_Y1197	EGFR
P49792_S1160	RANBP2	P51610_S598	HCFC1
P42166_S433	TMPO	P51531_S698	SMARCA2
P38159_S251	RBMX	P49792_S955	RANBP2
P38159_S280	RBMX	P42166_S310	TMPO
P38159_S326	RBMX	P42166_S156	TMPO
P26358_S143	DNMT1	P42166_S159	TMPO
P26358_S714	DNMT1	P42166_T160	TMPO
P18887_S266	XRCC1	P42166_S433	TMPO
P18887_S241	XRCC1	P38159_S328	RBMX
P17096_S44	HMGA1	P26358_S127	DNMT1
P17096_S9	HMGA1	P26358_S714	DNMT1
P17096_S36	HMGA1	P18887_S241	XRCC1
P17096_T53	HMGA1	P17096_S36	HMGA1
P11388_S1106	TOP2A	P17096_T53	HMGA1
P07910_S138	HNRNPC	P17096_S9	HMGA1
P06748_T199	NPM1	P11388_S1213	TOP2A
P00533_Y1197	EGFR	P11388_S1504	TOP2A
O75475_T122	PSIP1	P07910_S115	HNRNPC
O75475_S116	PSIP1	P07910_S138	HNRNPC
O14497_S1184	ARID1A	P06748_S260	NPM1
		P06748_T199	NPM1
		P00533_S1064	EGFR
		P00533_Y1197	EGFR
		O75475_S206	PSIP1
		O14497_S696	ARID1A
		O14497_S382	ARID1A
